# Supplementary material for: Novel non-peripheral mercaptopyridine-substituted mono- and double-decker lutetium(iii) phthalocyanines: synthesis, photophysicochemical and electrochemical properties
Source: Royal Society of Chemistry journal article supplement (doi:10.1039/d3dt04341j), 2024-01-01
Supplement: d3dt04341j1.pdf [file d3dt04341j1.pdf]

## Supplementary Information

### **Novel Non-Peripheral Mercaptopyridine Substituted Mono and Double- Decker Lutetium (III) Phthalocyanines: Synthesis, photophysicochemical, and electrochemical properties**

İpek Ömeroğlu\*

*<sup>a</sup>Department of Chemistry, Faculty of Basic Sciences, Gebze Technical University,  
Kocaeli, Turkey*

\*Correspondence: [iomeroglu@gtu.edu.tr](mailto:iomeroglu@gtu.edu.tr)

## 1. Materials and equipment

3-(2-mercaptopyridine)phthalonitrile<sup>1</sup> and 1(4), 8(11), 15(18), 22 (25)-tetrakis-(2-mercaptopyridine)phthalocyanine (**H<sub>2</sub>Pc**)<sup>2</sup> were synthesized by the according to the literature. Also, all chemicals and reagents were purchased from commercial suppliers. FT-IR spectra were recorded on a Perkin Elmer Spectrum spectrometer. The mass spectra were obtained on a Bruker Microflex LT by MALDI-TOF technique by using dithranol (DIT) as a MALDI matrix. Absorption spectra were recorded with a Shimadzu 1800 UV-Vis spectrophotometer and a Shimadzu 3600 Plus UV-Vis-NIR spectrophotometer. Fluorescence emission spectra were obtained by a Varian Eclipse spectrofluorometer. Fluorescence lifetimes were measured by a time-correlated single photon counting (TCSPC) method using a Fluorolog-3 spectrofluorometer (Horiba JobinYvon, Edison, NJ) equipped with a NanoLED and a standard air-cooled R928 PMT detector. <sup>1</sup>H-NMR spectrum was recorded on a Bruker 500 MHz spectrometer in DMSO-d<sub>6</sub> and a chemical shift (δ) is shown in ppm. The electron spin resonance (ESR) spectrum was recorded at room temperature with a microwave frequency of 9.86 Hz with a JEOL ESR spectrometer (JESFA300).

## 2. Photophysical and photochemical measurements

### 2.1. Fluorescence quantum yields (Φ<sub>F</sub>) and lifetimes (τ<sub>F</sub>)

Fluorescence quantum yield (Φ<sub>F</sub>) is determined by the comparative method according to the equation 1<sup>3,4</sup>

$$\Phi_F = \Phi_{F(Std)} \frac{F \times A_{Std} \times n^2}{F_{Std} \times A \times n_{Std}^2}$$

(1)

where  $F$  and  $F_{Std}$  are the areas under the fluorescence emission curves of the novel non-peripheral tetra mercaptopyridine substituted lutetium (III) phthalocyanines (**LuPc** and **LuPc<sub>2</sub>**) and the standard, respectively.  $A$  and  $A_{Std}$  are the respective absorbance of the compounds (**LuPc** and **LuPc<sub>2</sub>**) and standard at the excitation wavelengths, respectively.  $n^2$  and  $n_{Std}^2$  are the refractive indices of solvents used for the sample and standard, respectively. Unsubstituted ZnPc was employed as a standard compound ( $\Phi_F = 0.20$  in DMSO).<sup>5</sup> The absorbances of the studied lutetium (III) phthalocyanine compounds (**LuPc** and **LuPc<sub>2</sub>**) and the standard unsubstituted ZnPc were kept  $\sim 0.05$  at the excitation wavelength.

Fluorescence lifetimes were measured using a time-correlated single photon counting setup (TCSPc). The average fluorescence lifetime of the charge carriers is estimated by using equation 2.<sup>6</sup>

$$\tau_a = \frac{\sum a_i \tau_i^2}{\sum a_i \tau_i}$$

(2)

## 2.2. Singlet oxygen quantum yields ( $\Phi_\Delta$ )

Singlet oxygen quantum yields ( $\Phi_\Delta$ ) of the non-peripheral tetra mercaptopyridine substituted phthalocyanines (**H<sub>2</sub>Pc**, **LuPc**, and **LuPc<sub>2</sub>**) were carried out using the experimental set-up described in the literature.<sup>7, 8</sup> Typically, a 3 mL portion of phthalocyanine solutions ( $C = 1 \times 10^{-5}$  M) containing the singlet oxygen quenchers were irradiated in the Q band region with the photo-irradiation set-up described in references.<sup>7.</sup>

<sup>8</sup> Singlet oxygen quantum yields ( $\Phi_\Delta$ ) were determined in air using the relative method

using unsubstituted ZnPc in DMSO as a reference. 1,3-Diphenylisobenzofuran (DPBF) was used as a chemical quencher for singlet oxygen in DMSO. Equation 3 was employed for the determination of  $\Phi_{\Delta}$  value:

$$\Phi_{\Delta} = \Phi_{\Delta}^{Std} \frac{R \times I_{abs}^{Std}}{R^{Std} \times I_{abs}}$$

(3)

where is the singlet oxygen quantum yield for the standard ZnPc ( $\Phi_{\Delta} = 0.67$  in DMSO)<sup>9</sup>  $R$  and  $R_{Std}$  are the DPBF photobleaching rates in the presence of the respective phthalocyanines (**H<sub>2</sub>Pc**, **LuPc**, and **LuPc<sub>2</sub>**) in DMSO and standard, respectively.  $I_{abs}$  and  $I_{abs}^{Std}$  are the rates of light absorption by compounds (**H<sub>2</sub>Pc**, **LuPc**, and **LuPc<sub>2</sub>**) and standard, respectively. To avoid chain reactions induced by quenchers (DPBF) in the presence of singlet oxygen, the concentration of quencher (DPBF) was lowered to  $\sim 3 \times 10^{-5}$  M.<sup>10</sup> Solution of a sensitizer ( $C = 1 \times 10^{-5}$  M) containing a quencher (DPBF) was prepared in the dark and irradiated by the light at around the Q band of the studied phthalocyanines. The DPBF photooxidation was monitored at 417 nm. The light intensity  $6.21 \times 10^{15}$  photons  $s^{-1} cm^{-2}$  was used for  $\Phi_{\Delta}$  determination.

### 3. Electrochemical measurements

Electrochemical measurements were performed by CHI Instruments/CHI842B using the three-electrode system with a glassy carbon working electrode (GCE, 3 mm), Ag/AgCl reference electrode, and platinum wire as a counter electrode. The electrochemical properties of phthalocyanine compounds (**LuPc** and **LuPc<sub>2</sub>**) were studied by cyclic voltammetry (CV) and square wave voltammetry (SWV). These measurements were carried out with 0.1 M tetrabutylammonium hexafluorophosphate (TBAPF<sub>6</sub>) as a

supporting electrolyte in dichloromethane (DCM) at 25 °C under a high purity argon atmosphere.

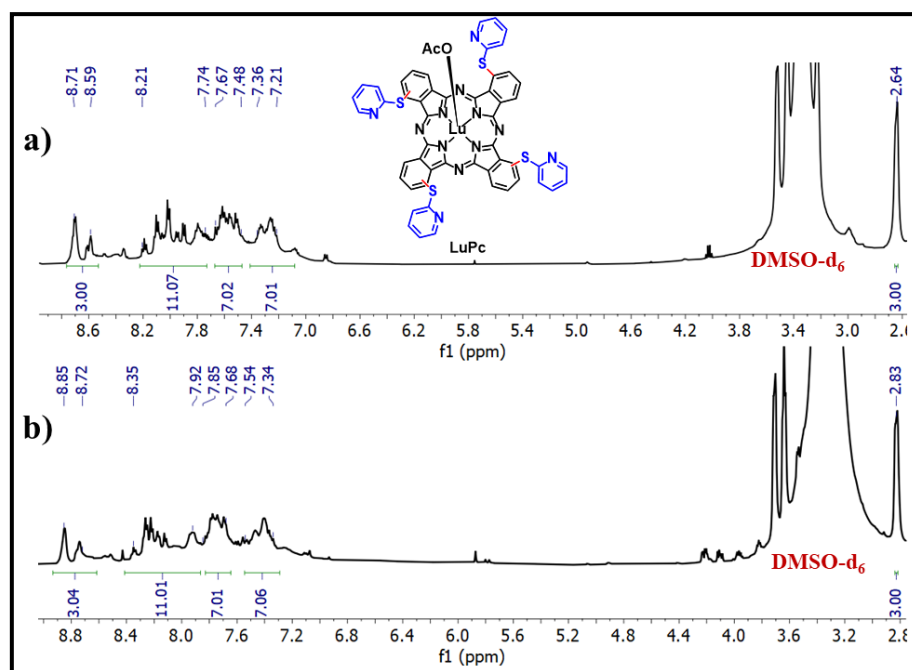

**Fig. S1:** <sup>1</sup>H-NMR spectra of LuPc in DMSO-d<sub>6</sub> a) room temperature and b) 65 °C.

## References

1. M. Durmuş, H. Yaman, C. Göl, V. Ahsen and T. Nyokong, *Dyes and Pigments*, 2011, **91**, 153-163.
2. Y. Arslanoğlu, M. Idowu and T. Nyokong, *Spectrochimica Acta Part A: Molecular and Biomolecular Spectroscopy*, 2012, **95**, 407-413.
3. M. D. Maree, T. Nyokong, K. Suhling and D. Phillips, *Journal of Porphyrins and Phthalocyanines*, 2002, **6**, 373-376.
4. S. Fery-Forgues and D. Lavabre, *Journal of chemical education*, 1999, **76**, 1260.
5. A. Ogunsipe, J.-Y. Chen and T. Nyokong, *New Journal of Chemistry*, 2004, **28**, 822-827.
6. S. O. Tümay, A. Şenocak and A. Mermer, *New Journal of Chemistry*, 2021, **45**, 18400-18411.
7. M. Durmuş, *Photosensitizers in medicine, environment, security*, 2012, 135-266.
8. A. Ogunsipe and T. Nyokong, *Journal of Photochemistry and Photobiology A: Chemistry*, 2005, **173**, 211-220.
9. N. Kuznetsova, N. Gretsova, E. Kalmykova, E. Makarova, S. Dashkevich, V. Negrimovskii, O. Kaliya and E. Luk'Yanets, *Russian Journal of General Chemistry*, 2000, **70**, 133-140.

10. W. Spiller, H. Kliesch, D. Wöhrle, S. Hackbarth, B. Röder and G. Schnurpfeil, *Journal of Porphyrins and Phthalocyanines*, 2012.
